# Supplementary material
Source: publisher site journal article supplement (https://www.degruyterbrill.com/publication/isbn/9783839426050/downloadAsset/9783839426050_Leseprobe.pdf)
Supplement: Supplementary file 1 [file 9783839426050_Leseprobe.pdf]

**Aus:**

*Daniel Bogner*

## **Das Recht des Politischen**

### **Ein neuer Begriff der Menschenrechte**

Juli 2014, 336 Seiten, kart., 34,99 €, ISBN 978-3-8376-2605-6

Wie sind die Menschenrechte heute angemessen zu verstehen? Sich ausschließlich auf ihren rechtlichen Gehalt oder ethisch-moralischen Anspruch zu konzentrieren, genügt dafür offenbar nicht. Notwendig ist es vielmehr, die *Dimension des Politischen*, die diesen Rechten eigen ist, systematisch in den Blick zu nehmen: Erst im Feld der sozialen Praxis und in den historisch bezeugten Erfahrungen handelnder Individuen wird ein moralisch-rechtlicher Anspruch konkret greifbar. Am Beispiel des zeitgenössischen Umgangs mit dem Erbe des französischen Kolonialkrieges in Algerien setzt Daniel Bogner Theorie und Praxis, Normativität und Geschichte konsequent miteinander in Beziehung.

Ergebnis ist ein neues Verständnis der Menschenrechte – jenseits der Sackgassen einer rein historischen oder exklusiv geltungstheoretischen Perspektive.

**Daniel Bogner** (Prof. Dr. theol.) lehrt Moraltheologie und Theologische Ethik an der Universität Fribourg/Schweiz.

Weitere Informationen und Bestellung unter:  
[www.transcript-verlag.de/978-3-8376-2605-6](http://www.transcript-verlag.de/978-3-8376-2605-6)

# Inhalt

---

## Einleitung | 9

## I. Zwischen Theorie und Praxis – Menschenrechte | 17

1. Wie über die Menschenrechte reden? | 18
  - 1.1 Das Quid-pro-quo praktischer Menschenrechtsarbeit | 19
  - 1.2 Menschenrechte als flexible Größen einer Moralpolitik? | 21
  - 1.3 Die Ambivalenz kirchlich-theologischer Rede von den Menschenrechten | 24
  - 1.4 „Affirmative Genealogie“ als Vermittlungsangebot | 31
2. Der blinde Fleck – Politik und Menschenrechte | 38
  - 2.1 Die Bewegung einer Praxis entbinden. Menschenrechte als Prozesskategorie | 40
  - 2.2 Die Verschränkung von Geschichte und Gegenwart im Begriff der Menschenrechte | 46
3. Erfahrungen lesen. Eine hermeneutische Herausforderung | 53
  - 3.1 Kollektive Vorgabe und individuelle Bringschuld | 55
  - 3.2 Nationales Gedächtnis und Identität. Der tote Winkel eines Forschungsprogramms | 58
  - 3.3 Der Algerienkrieg im Erfahrungszeugnis. Forschungsstand und Methode | 61

## II. Erfahrungen mit einem Ideal.

### Zeugnisse aus dem Algerienkrieg | 67

4. Paul Aussaresses,  
Services spéciaux. Algérie 1955–1957 (2001) | 68
  - 4.1 Das Zeugnis des affirmativen Militärs | 68
    - 4.1.1 Was wird beschrieben? | 68
    - 4.1.2 Das Selbstbild Aussaresses' | 76
    - 4.1.3 Aussaresses' Blick auf Gewalt und Folter | 83
    - 4.1.4 Normen und Werte in subjektiver Sicht | 90

- 4.2 Sozialer Deutungsrahmen und zeitgeschichtlicher  
Verstehenshintergrund | 98
  - 4.2.1 Die französische Folterdebatte | 99
  - 4.2.2 Das politische Erbe: Amnestie | 108
  - 4.2.3 Geschichte und Erinnerung:  
Wie erinnern? Welche Geschichte schreiben? | 118
  
- 5. Pierre-Alban Thomas,  
Les Désarrois d'un officier en Algérie (2002) | 128
  - 5.1 Das Zeugnis des selbstkritischen Militärs | 129
    - 5.1.1 Herkunft und Selbstbild | 129
    - 5.1.2 Soziale Bezüge und Beziehungen | 136
    - 5.1.3 Der Umgang mit Werten und Normen | 146
  - 5.2 Die Fiktion der Nation als Handlungsgrundlage | 161
    - 5.2.1 „Französisch-Algerien“ – ein semantisches Missverständnis | 163
    - 5.2.2 Der Umgang mit den anderen: Anspruch und Wirklichkeit | 171
    - 5.2.3 Die Résistance als Mythos zur Ehrenrettung | 177
  
- 6. Louise Ighilahriz,  
Algérienne. Récit recueilli par Anne Nivat (2001) | 188
  - 6.1 Das Zeugnis des Folteropfers | 190
    - 6.1.1 Der Kolonialkrieg als organisierendes Zentrum.  
Biografische Etappen | 190
    - 6.1.2 Bindungen an die anderen:  
Typologien eines Fremdverhältnisses | 195
    - 6.1.3 Das Selbstverhältnis als Reflex aus dem Erleben  
der anderen | 209
  - 6.2 *Algérienne* vor dem Horizont der Täterzeugnisse | 216
    - 6.2.1 Ein Geschehen, drei Deutungen | 217
    - 6.2.2 Das ideenpolitische Kräftefeld:  
Republik und Menschenrechte | 221
    - 6.2.3 Idealismus als Staatsräson? | 226

### **III. Menschenrechte, Politik und Erfahrung. Sozialethische Klärungen | 231**

- 7. Geformt durch Praxis und prägend für Praxis –  
der Menschenrechtsanspruch im Lichte  
der Erfahrungszeugnisse | 233
  - 7.1 ... in der Bannkraft der Gewalt | 235
  - 7.2 ... als Merkmal von Identität | 241

- 7.3 ... zwischen subjektivem Sinn und kollektivem Eingebundensein | 246
- 7.4 ... unter den Zeichen von Zeitlichkeit und Geschichte | 251
- 7.5 Verkörperungen moralischen Sinns: soziale Praxis | 253
- 8. Sozialethische Diskussionsfelder | 258
  - 8.1 Erfahrung, Zeugnis, Gedächtnis | 260
    - 8.1.1 Ein verletztes Gedächtnis | 262
    - 8.1.2 Erinnerung an die Zukunft der Geschichte | 272
  - 8.2 Gesellschaftswerdung und kollektive Identität | 275
    - 8.2.1 Die Selbsthervorbringung der Gesellschaft aus Akten der Kreativität | 278
    - 8.2.2 Imaginäre Bedeutungen und gesellschaftliche Symbolsprache | 283
    - 8.2.3 Entfremdung oder Autonomie? Das Republik-Ideal als Testfall | 286
  - 8.3 Welche Erfahrungen zählen in der sozialen Gemeinschaft? | 293
    - 8.3.1 Erfahrungen begrenzen – Erfahrungen ermöglichen | 295
    - 8.3.2 Herausforderungen politischen Handelns | 300

**Eine erst herzustellende Wahrheit – Politik | 307**

**Literaturverzeichnis | 321**

## Einleitung

---

„[L]es humains ne sont humains que parce qu'ils ont la capacité de transformer en valeur ce qui les opprime et de s'y sacrifier. C'est l'humanité même, mais cela peut s'appeler aussi bien tradition, on l'a vu, et plus encore, culture.“<sup>1</sup>

CLAUDE LANZMANN

Dieses Buch beschäftigt sich mit der Wirklichkeit der Menschenrechte, nicht in erster Linie mit ihrer Geschichte. Für eine Untersuchung, die mit dem französischen Kolonialkrieg in Algerien (1954–62) einen Gegenstand der Zeitgeschichte sogar im Titel führt, mag das verwundern. Und die historische Befassung mit den Menschenrechten hat gerade in jüngerer Zeit Konjunktur. Vielfach wird danach gefragt und erforscht, wie der doch recht erfolgreiche Entwicklungsweg des Menschenrechtsethos zu verstehen ist oder was als „Ursprung“ der Menschenrechte ausgemacht werden kann – säkulare Vernunft, religiöse Tradition oder gar eine Mischung aus beidem? Solche historischen Beiträge und Fragen bilden einen Anstoß für die Auseinandersetzungen, die hier geführt werden. Sie sind so etwas wie der Katalysator eines Interesses, das an die historisch-genealogische Perspektive anschließt, aber über sie hinausreicht: Was geschieht mit den Ansprüchen der Menschenrechte, sobald sie einmal in der Welt sind? Wie lässt sich die Wirkungsweise der Menschenrechte im konkreten politisch-sozialen Alltag angemessen verstehen? Ohne Klärungen zu diesem Problemfeld bleibt der Gegenstand der Menschenrechte eigentümlich fremd.

Die Hypothese dieser Studie lautet also, dass es eine notwendige Ergänzung und Erweiterung der historischen Perspektive bedarf. Über die Herkunft der Menschenrechte Bescheid zu wissen, genügt nicht, weil diese Rechte alles andere sind als ein

---

1 „Menschen sind nur Menschen, weil sie die Fähigkeit haben, in einen Wert zu verwandeln, was sie unterdrückt, und sich dem ganz hinzugeben. Das ist die Menschlichkeit selbst, aber man kann es genauso gut Tradition nennen, man kennt das, und mehr noch: Kultur.“ Claude Lanzmann, *Le Lièvre de Patagonie*, Gallimard: Paris, 2009, 328.

statischer Komplex. Sie bringen uneingelöste Ansprüche auf den Punkt. Sie formulieren Zielvorgaben. Ihre beständige Antizipation – einer menschenwürdigen Existenz – setzt die historische Vergewisserung außer Stand, die Natur dieser Rechte abschließend zu erfassen. Der in historischen Deklarationen oder im positiven Recht festgehaltene Katalog der Grundbedingungen menschlicher Existenz gibt keine Auskunft darüber, ob und wie diese Rechte jemals Realität werden könnten – und wie diese Realität aussehen sollte. Die Debatte zur Herkunft der Menschenrechte ist deshalb eine notwendige Auseinandersetzung, aber sie genügt nicht, um die Rolle der Menschenrechte in der Gegenwart zu beschreiben.

Nun ist es durchaus legitim, sich mit der geschichtlichen Herkunft der Menschenrechte zu befassen, ohne jedes Mal auf das Wechselverhältnis von Herkunft und Wirkung einzugehen. Nähert man sich als Historiker dem Thema Menschenrechte, sind eben Entstehungsfragen von vorrangigem Interesse. Zugleich wird aber kaum jemand bestreiten, dass die Entwicklung und Herkunft eines politisch-sozialen Sachverhalts mit darüber entscheidet, ob ein damit begründeter Geltungsanspruch in der Gegenwart fortbesteht und Wirkung hat. Für komplexe institutionelle Gebilde – den Nationalstaat, das Verfassungsprinzip oder Modelle transnationaler Kooperation wie die Europäische Union oder die Vereinten Nationen – leuchtet das ohne weiteres ein: Im Entstehungsprozess bildet sich, vor dem Hintergrund einer bestimmten geschichtlichen Lage, eine institutionelle Formation heraus; deren historisch gewordene Gestalt wiederum ist für ihre Rezeptionschancen und -hindernisse in künftigen, sich verändernden zeitlichen Kontexten (mit-) verantwortlich. Warum sollte das bei den Menschenrechten grundsätzlich anders sein?

Wenn diese Rechte aber, wie Stefan-Ludwig Hoffmann es ausdrückt, „in der Gegenwart zu den wichtigsten Glaubensartikeln liberaler Demokratien“ gehören, ist es geradezu geboten, über die Frage nach der Herkunft hinauszugehen. „Wer die Menschenrechte anzweifelt, stellt sich anscheinend außerhalb der Grenzen einer universellen Moral im Zeitalter von Weltinnenpolitik.“<sup>2</sup> Stimmt dieses Diktum, dann erscheint es erforderlich, nicht nur nach dem *Woher* des einflussreichen Imperativs zu fragen, sondern auch seine *Wirkungsweise* in der Gegenwart zu beleuchten.

In den Diskussionen zur Entstehung der Menschenrechte sticht ein Ansatz heraus: Hans Joas schlägt eine Genealogie der Menschenrechte vor, in welcher Aspekte der geschichtlichen Herkunft sowie der gegenwärtigen Geltung der Menschenrechte miteinander vermittelt werden sollen.<sup>3</sup> In vielfacher Hinsicht ist das vorliegende

---

2 Stefan-Ludwig Hoffmann, *Moralpolitik. Geschichte der Menschenrechte im 20. Jahrhundert*, Wallstein: Göttingen, 2010, 7.

3 Vgl. Hans Joas, *Die Sakralität der Person. Eine neue Genealogie der Menschenrechte*, Suhrkamp: Berlin, 2011.

Buch durch die Studien und Überlegungen von Joas inspiriert, besonders durch ein zentrales Motiv: Joas vertritt die These, dass historische Gründe nicht nur als mögliche Entzauberung eines auf die Gegenwart bezogenen Geltungsanspruchs gedeutet werden müssen, sondern auch als Grundlage, Erschließungshilfe und Bestärkung solcher Ansprüche dienen können. Dieser Gedanke ist faszinierend, gerade im Zusammenhang der Menschenrechte. Denn er besagt, dass aus der Geschichte der Menschenrechte und aus historischen Umständen und Situationen, in denen die Idee von Menschenrechten auf irgendeine Weise mitschwingt, etwas zu lernen ist über den eigentümlichen Geltungsanspruch, den die Menschenrechte heute entfalten. Das Feld der Geschichte wird durch einen solchen Anspruch also zu einem bevorzugten Ansatzpunkt für die systematisch-begründende Rede zu den Menschenrechten.

Eine notwendige Folgefrage lautet, in welcher Form sich Geschichte einbeziehen und zur Basis weiterer Reflexionen machen lässt. Hierfür wird sich kein Patentrezept benennen lassen, so vielfältig und auf unterschiedliche Weise aussagekräftig sind die Methoden historischer Hermeneutik. Für die hier vorliegende Untersuchung wurde ein bestimmter Weg gewählt, nämlich die Arbeit mit und an autobiografisch bezeugten Erfahrungen. Drei Akteure, die auf unterschiedliche Weise in das Konfliktgeschehen involviert waren, beschreiben aus ihrer Sicht und von ihrem sozialen und ideologisch-mentalischen Platz aus das eigene Erleben im Krieg.

Um in der Weise, wie sie von Joas vorgeschlagen wird, Geschichte und Geltung miteinander in Beziehung zu setzen, kommt es einerseits darauf an, solche Erfahrungszeugnisse historisch-kritisch zu kontextualisieren. Andererseits sind sie mit einem bestimmten Interesse zu lesen, das die leitende Frage dieser Untersuchung aufgreift: Sie sind jeweils auf das in ihnen vernehmbare Echo eines menschenrechtlichen Geltungsanspruchs zu befragen. Die Suche gilt dem reziproken Wirkungszusammenhang zwischen menschenrechtlichem Soll und kontingenter Erfahrung. Autobiografische Zeugnisse scheinen sich mehr als andere Textsorten für ein solches Unterfangen zu eignen. Denn sie bringen mit der Subjektperspektive unmittelbar mehrere Dimensionen zur Sprache, die für die Frage nach der Geltung von Normen entscheidend sind: die Dimension individueller Akzeptanz, die Ebene sozialen Handelns, das sich gegebenenfalls aus der Normgeltung ergibt, aber auch Fragen der sinnhaften Füllung eines solchen moralisch-normativen Anspruchs.

Bei aller Betonung der Subjektperspektive gilt: Historisch überlieferte, subjektiv bezeugte Erfahrungen können nicht als ein unvermittelt entgegnzunehmendes *factum brutum* verstanden werden. Sie sind eingebettet in Kontexte sozialer und mentaler Deutung und institutioneller Prägung, in denen allein sie rezipierbar sind. Ein besonderes Augenmerk sollte deshalb der Methode gelten, welche den Einbezug solcher Erfahrungen steuert. Eine binäre, allzu simple Logik zwischen Innen und Außen, zwischen dem vermeintlich materialen Substrat der Menschenrechte und seinen historischen Äußerungsformen würde nicht weiterhelfen. Politisch-

soziale Situationen und Kontexte, die in der Auslegung historisch bezeugter Erfahrungen ansichtig gemacht werden können, sind der Ort, an dem der Anspruch in Erscheinung tritt und als eine Realität greifbar wird. Nur anhand solcher Situationen lässt sich ermesen, welche mögliche Wirkung die Menschenrechte entfalten können oder – oft genug – auch verfehlen. Nicht der in historischer oder soziologischer Strukturanalyse erzeugte Blick „von oben“ auf bestimmte Kontexte, in denen sich der Menschenrechtsanspruch erweisen muss, wird hier gewählt, sondern das Prisma subjektiver, menschlicher Erfahrungen. Sie sind der „Entwickler“ für die Wirkung der Menschenrechte.

Ein solcher Blick „von innen“ entspricht dem Gegenstand der Studie. Menschenrechte setzen an der Existenz des menschlichen Individuums an; sie formulieren Standards für die Bedingungen dieser Existenz. Das in Verbindung mit den Menschenrechten häufig zur Anwendung kommende Kriterium der Menschenwürde signalisiert, dass diese Standards wiederum gegenstandsgemäß sein müssen, also auf die Existenz des Menschen bezogen. Für ein Unterfangen, das an der Wirkung und Auswirkung menschenrechtlicher Ansprüche interessiert ist, erscheint es deshalb naheliegend, in seinem methodischen Vorgehen die Subjektperspektive zum Ausgangspunkt zu nehmen. Diese wird über Zeugnisse subjektiver Erfahrungen ansatzweise zugänglich.

Das Feld der Geschichte und die darin gemachten und bezeugten Erfahrungen sind ein wesentliches Element, um die eigentümliche Natur der Menschenrechte besser zu begreifen. Aber es wäre zu kurz gegriffen, bei der Erhebung jener geschichtlichen Situationen stehenzubleiben, in denen sich die Logik der Menschenrechte Bahn bricht. Erst eine zweite, politisch-sozialethisch ausgerichtete Lektüre solcher Situationen erlaubt Auskünfte über die Wirkweise menschenrechtlicher Ansprüche. Darunter zählt vor allem die Frage: Wie muss man das Verhältnis bewerten zwischen der konkreten Situation, in der sich individuelle und kollektive Akteure befinden, und dem Verständnis des menschenrechtlichen Anspruchs? Wie kann davon die Rede sein, dass sie sich gegenseitig prägen und bestimmen? Aus beiden Größen einen prinzipiellen Zusammenhang zu formulieren, ist die Herausforderung dieses Buches.

Über die geschichtliche Herkunft der Menschenrechte zu sprechen, ohne die – über die Erfahrungszeugnisse rekonstruierte – praktisch-politische Wirkungsperspektive im Blick zu haben, gleicht einem Weg, für dessen Bewältigung zwar das richtige Fortbewegungsmittel gewählt wurde, bei dem man aber auf halber Strecke zum Stehen kommt, weil man das Ziel nicht richtig fixiert hatte. Die Natur der Menschenrechte, so die Überzeugung, die diesem Buch zugrunde liegt, lässt sich nicht als Entwicklungsgeschichte bestimmter Ideen und Einsichten darlegen, unabhängig von der politischen Wirklichkeit, in der diese Ideen sich bewähren müssen



und ihrerseits geformt werden. In diesem Sinne ist hier von einem „Recht des Politischen“ die Rede.

Auch die Ebene des politischen Handelns zu den Menschenrechten erhält vor diesem Hintergrund eine neue Bedeutung. Politik ist dann nicht mehr zu verstehen als reine „Umsetzung“ eines anderswo definierten Anforderungskatalogs, die dessen Gehalte unberührt lässt. Sie steht vielmehr in einem reziproken Verhältnis mit den Menschenrechten: Praktische Politik wird sich einerseits von den Menschenrechten bestimmen lassen, andererseits sind die Bedingungen des Vollzugs politischer Praxis ihrerseits ausschlaggebend für das sachliche Verständnis der Menschenrechte. Das zeigt: Es ist notwendig, die politische Wirklichkeit der Menschenrechte – ihre Anwendungsfälle, ihre Umsetzungskontexte, ihre Auslegungsweisen – in Rechnung zu stellen. Weit davon entfernt, nur ein zweites Moment der Menschenrechte zu sein, ist diese politische Dimension mitbestimmend für das Verständnis der Sache. Politik – ob in Form institutionellen Handelns oder mittels der mikropolitisch zu verstehenden Aneignungsweisen des Subjekts – bewirkt erst die Verkörperung eines moralischen Anspruchs. In und durch politisches Handeln wird der Anspruch realisiert, in seinem Gehalt moduliert, in seiner Bandbreite variiert.

Mit dieser Perspektive soll letztlich ein erneuertes Verständnis der Menschenrechte gewonnen werden. Enttäuschte Erwartung und Zynismus sind eine nachvollziehbare Reaktion angesichts der vielfach zur Farce gewordenen realen Menschenrechtspolitik staatlicher Akteure. Frank Schirmmacher spricht von der „Travestie der Menschenrechtspolitik“<sup>4</sup>. In der Metapher liegt noch die Ahnung, es könne und solle anders sein, als es die Beobachtung nahelegt. Als moralischer Grundsatz aber, so Schirmmacher, taugen die Menschenrechte nicht mehr; spätestens mit den Finanzkrisen der 2000/2010er-Jahre seien sie vom Begriff der *Schulden* als letztem unhinterfragt existierenden Prinzip praktisch-moralischer Verständigung abgelöst worden. Ein geklärtes, von falschen Hypothesen bereinigtes Verständnis von Menschenrechten und menschenrechtlich interessierter Politik ist notwendig, um die Rede davon sachgemäß werden zu lassen, so dass dann auch wieder eine (sozial-)ethische Perspektive auf das offenbar diskreditierte Thema gefunden werden kann. Eine bestimmte Hermeneutik des Verhältnisses von Menschenrechten und Politik bildet also die Voraussetzung dieser Arbeit. Darin spiegelt sich die oft diskutierte Dialektik zwischen Theorie und Praxis wider. Ein wesentliches Resultat, das sich im Zuge der hier geführten Erörterungen einstellt, wird eine bestimmte Zuordnung beider Aspekte sein, die sich für das Verstehen von Wirklichkeit, zumindest in Sachen Menschenrechte, als weiterführend erweist.

---

4 Frank Schirmmacher, „Und vergib uns unsere Schulden“, in: FAZ vom 13.11.2011, verfügbar unter: <http://www.faz.net/aktuell/feuilleton/debatten/kapitalismus/eurokrise-und-vergib-uns-unsere-schulden-11527296.html> (zuletzt aufgerufen am 14.01.2014).

Der erste Schritt der Reflexionen besteht also in einer theoretischen Verständigung, auch wenn die Befassung mit dem historischen Gegenstand des Algerienkriegs den umfangreichsten Teil dieser Untersuchung bildet. Im ersten Kapitel wird erörtert, auf welche Weise gegenwärtig über die Menschenrechte gesprochen wird und welche Vorstellungen zum Verhältnis von Theorie und Praxis dafür jeweils leitend sind (I). Diese Vergewisserungen sind die Grundlage für die Beschäftigung mit dem historischen Material. Für die Auseinandersetzung mit dem eigentlichen Gegenstand der Untersuchung, den Erfahrungszeugnissen zum Algerienkrieg (II), ist damit ein Interpretationsrahmen gegeben. Ohne diese Arbeit „am Material“ wiederum hätte der hier vertretene theoretische Anspruch keinerlei Aussicht auf Plausibilität. Es bliebe dann bei einer abstrakten Auseinandersetzung um eine bestimmte Hermeneutik der Menschenrechte, die auch anderswo schon geführt wird. Ihr würde etwas Entscheidendes fehlen, das die Motivation zu diesem Buch ausmacht, nämlich die wechselseitige Integration der Dimensionen von Theorie und Praxis.

Eine Sicht auf die Menschenrechte, welche um die systematische Verknüpfung von Entstehung und Geltung bemüht ist, gerade aufgrund dieser Verknüpfung die Menschenrechte als ein dynamisches Prinzip politischen Handelns erkennt und damit eine neue Sichtweise von Politik etabliert, macht es erforderlich, diesen Zusammenhang von Entstehung und Geltung nicht nur zu behaupten, sondern ihn am historischen Material aufzuzeigen. Das Ineinander von Genesis und Geltung kann in methodischer Hinsicht nur induktiv, das heißt im Blick auf einzelne Phasen des historischen Geschehens einsichtig gemacht werden. Ein deduktives Vorgehen wäre ein performativer Widerspruch zum theoretischen Anspruch einer geschichtlich orientierten Erschließung von Geltungslogik.

Das ausgewählte Beispiel des Entkolonialisierungskampfes legt sich paradigmatisch für diese Veranschaulichung nahe, da sich Frankreich als staatlicher Akteur in besonderer Weise unter das Leitbild der Menschenrechte stellt und damit dem Handeln Einzelner eine identitäre Vorgabe macht. Die Zeugnisse von Akteuren des Konfliktgeschehens auszulegen, verspricht Auskünfte darüber, in welcher Hinsicht der Anspruch der Menschenrechte wirksam wird, welche Rolle dabei die institutionellen Vorgaben des Staates spielen und inwieweit einzelne Akteure selbst die Deutung und das Wirksam-Werden einer menschenrechtlichen Vorgabe beeinflussen. Wie kaum eine andere vorstellbare historische Konstellation enthält das Beispiel alle Faktoren, die für eine Bearbeitung des theoretisch skizzierten Rahmens erforderlich sind: subjektive Erfahrungen, die vor dem Horizont einer ideellen Vorgabe gemacht werden; eine ideelle Vorgabe wiederum, welche ihrerseits in die institutionelle Manipulation durch nationalstaatliche Politik und ihre Apparate – Militär, Parteien, Justizsystem – eingebunden ist. Die subjektive Apperzeption und Interpretation des moralisch-rechtlichen Solls ist der Schmelztiigel für den universalen Anspruch und die historische Wirklichkeit der Menschenrechte.

So wie eine bestimmte theoretische Sicht auf die Natur der Menschenrechte die hermeneutische Grundlage für die Befassung mit den französisch-algerischen Zeugnissen ist, gilt dies auch für den sich daran anschließenden Teil dieser Untersuchung: Die sozioethischen Überlegungen ergeben sich erst aus einer bestimmten Sicht auf den Zusammenhang von Politik und Menschenrechten und die Rolle historisch bezeugter Erfahrungen (III). Dieses abschließende Kapitel wird durch das zuvor entwickelte Verständnis der Menschenrechte plausibel und führt weiter, was bereits angedeutet wurde: dass Politik und politisches Handeln eine neue Wertigkeit erfahren, sobald das Feld historischer Erfahrung mitentscheidend wird für das Verständnis und die Rolle moralischer Geltungsansprüche. Es gibt einen Bedarf an ethischer Orientierung, welche anders zu bestimmen ist als das „Anwenden“ vorab festgelegter Maßgaben. Eine dieser veränderten Sicht auf die Menschenrechte entsprechende Ethik fragt vielmehr nach Wegen der Vermittlung individueller Erfahrungen innerhalb der sozialen Gemeinschaft. Sie befasst sich mit der Herausforderung, Erfahrungen überhaupt zur Sprache kommen zu lassen und damit auf grundständige Art und Weise Beteiligung – eine sozioethisch vielfach strapazierte Kategorie – zu ermöglichen.

Den Anfang macht aber eine Bestandsaufnahme: Wie lassen sich eigentlich die – akademischen und nicht-akademischen – Redeweisen charakterisieren, in denen man üblicherweise vom Gegenstand dieser Studie, den Menschenrechten, handelt?
